# Supplementary material for: Carbon Quantum Dots-Functionalized UiO-66-NH2 Enabling Efficient Infrared Light Conversion of 5-Hydroxymethylfurfuryl with Waste Ethanol into 5-Ethoxymethylfurfural
Source: MDPI journal article supplement (doi:10.3390/ijerph191610437), 2022-08-22
Supplement: s1 [file s1]

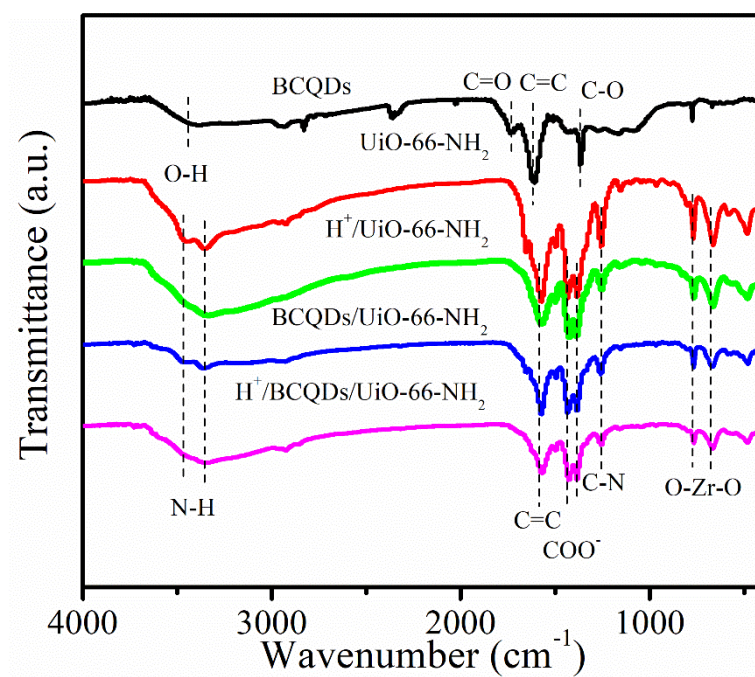

**Figure S1.** FT-IR spectra of BCQDs, UiO-66-NH<sub>2</sub>, H<sup>+</sup>/UiO-66-NH<sub>2</sub>, BCQDs/UiO-66-NH<sub>2</sub> and H<sup>+</sup>/BCQDs/UiO-66-NH<sub>2</sub>
